# Supplementary material
Source: Springer Nature journal article supplement (https://www.springermedizin.de/resource/supplementary/13045_2009_44_MOESM7_ESM.pdf/9660540)

Mlsl      1      2      3      4      5      6  
                 -      +      -      +

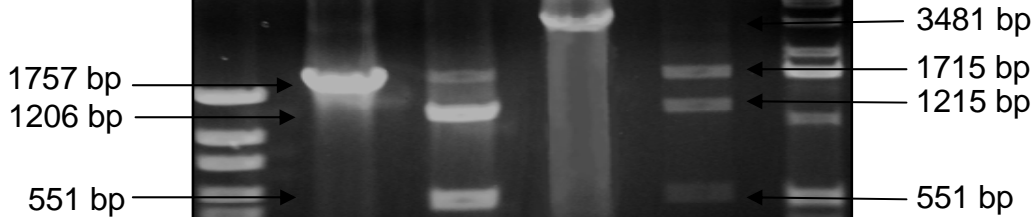

Genotype:      1-1      1-1      2-2      2-2

Supplement: MOESM7 [file 9660540]
